# Supplementary material for: Can an educational podcast improve the ability of parents of primary school children to assess the reliability of claims made about the benefits and harms of treatments: study protocol for a randomised controlled trial
Source: Trials. 2017 Jan 21;18:31. doi: 10.1186/s13063-016-1745-y (PMC5251251; doi:10.1186/s13063-016-1745-y)
Supplement: Additional file 3: — The CLAIM Evaluation Tools. (ZIP 1007 kb) [file 13063_2016_1745_MOESM3_ESM.zip]

Archive with 2 entries (2 files):
- IHC CLAIM_Adult Intervention_24 06 016R0.pdf
- IHC CLAIM_Adult Comparison_24 06 016 (1)R0.pdf
